# Supplementary material for: Facilitators and barriers for working beyond statutory pension age: A prospective cohort study across 26 European countries
Source: PubMed Central journal article supplement (PMC11618848; doi:10.5271/sjweh.4189), 2024-12-01

Appendix Figure 2. Development of statutory pension age (SPA) for women across 26 European countries from 2004 to 2022.

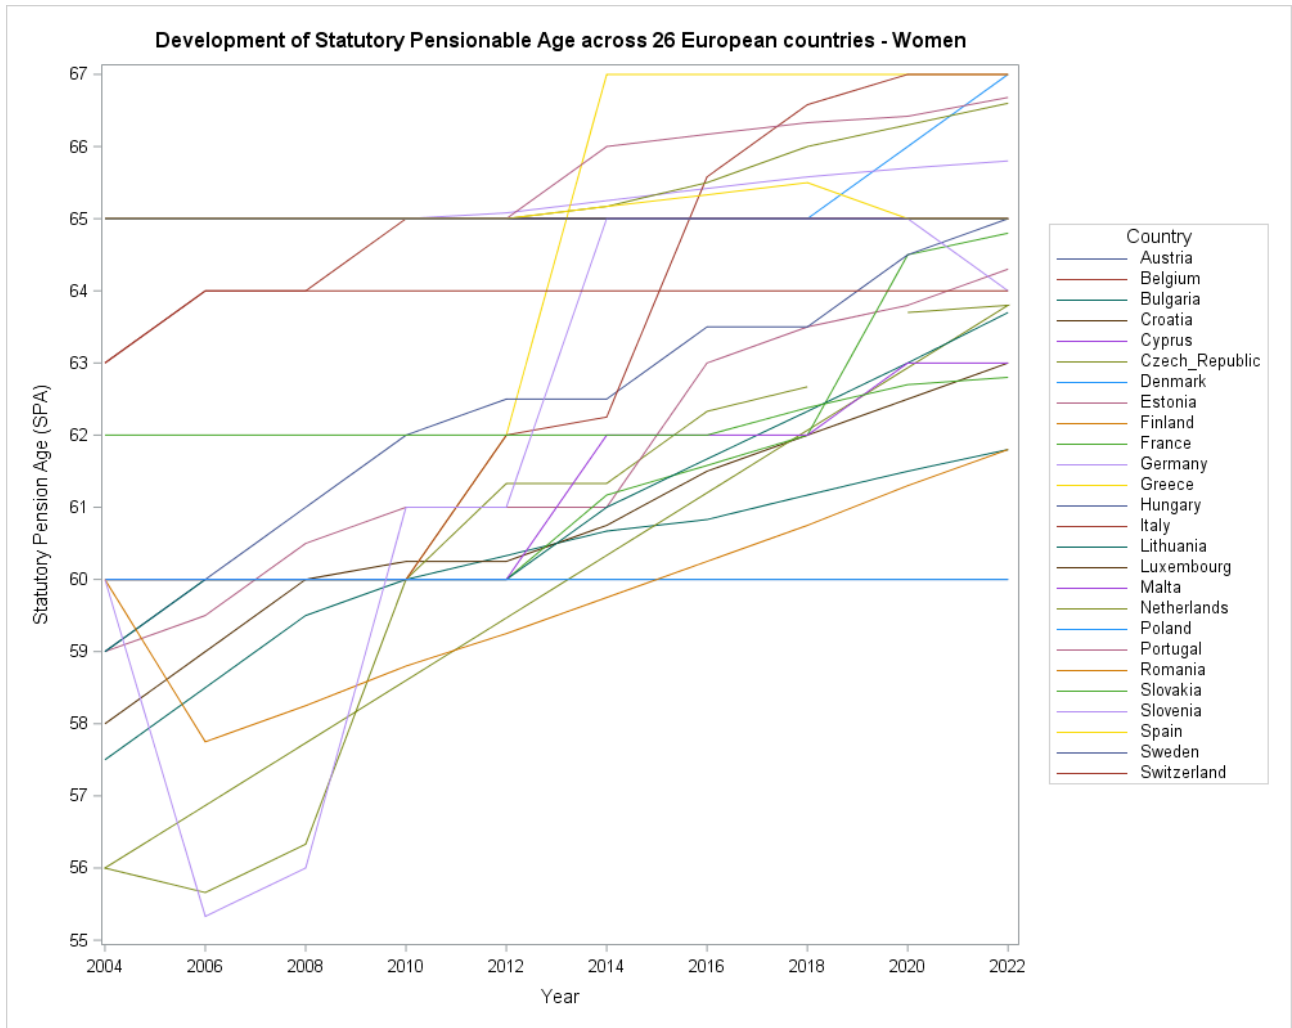

Appendix Figure 3. Development of statutory pension age (SPA) for men across the four European regions from 2004 to 2022.

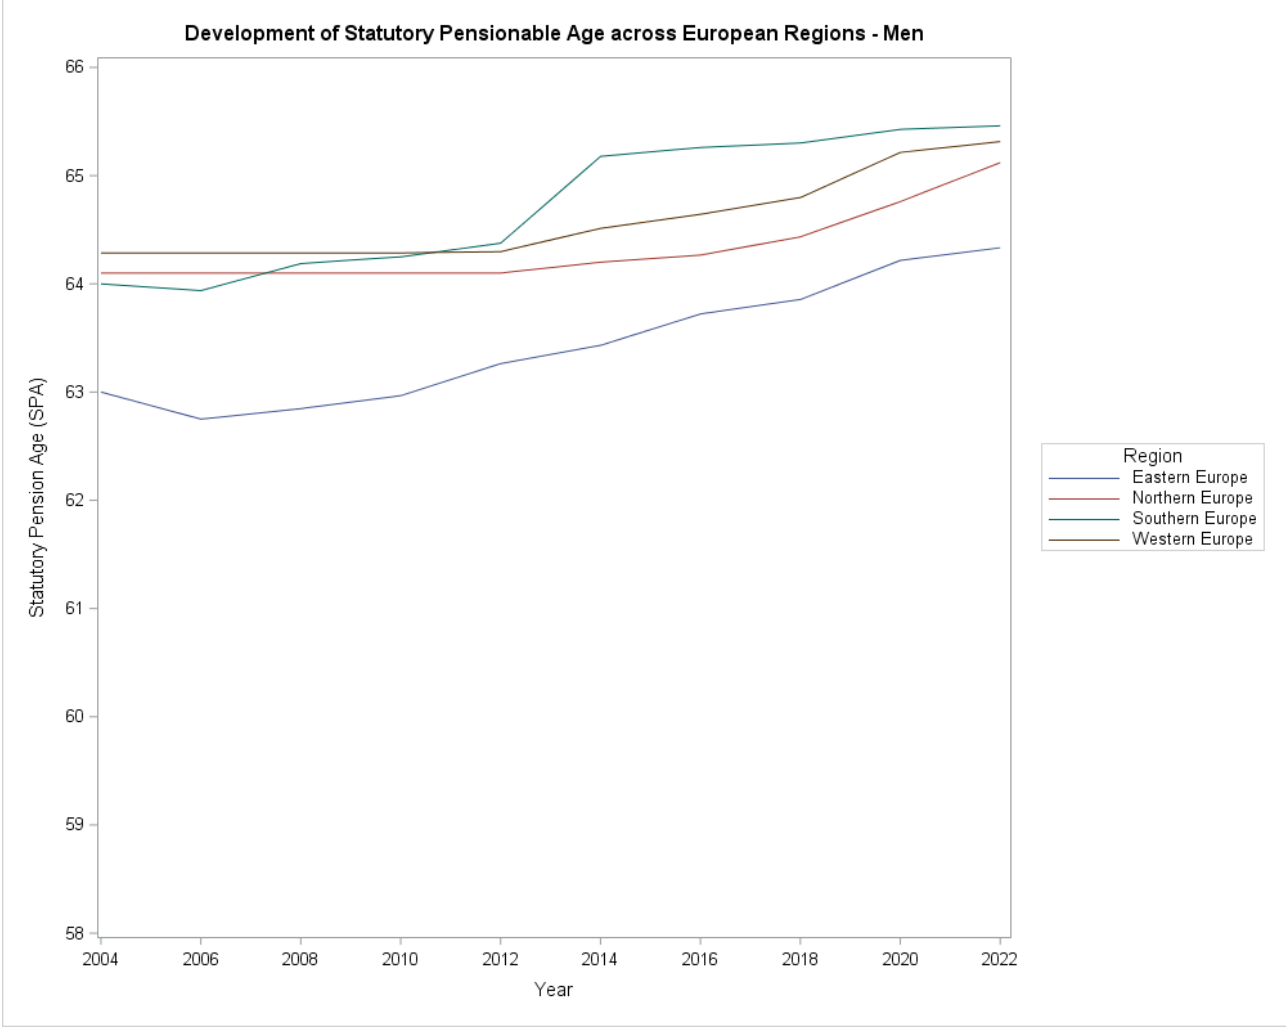

Appendix Figure 4. Development of statutory pension age (SPA) for women across the four European regions from 2004 to 2022.

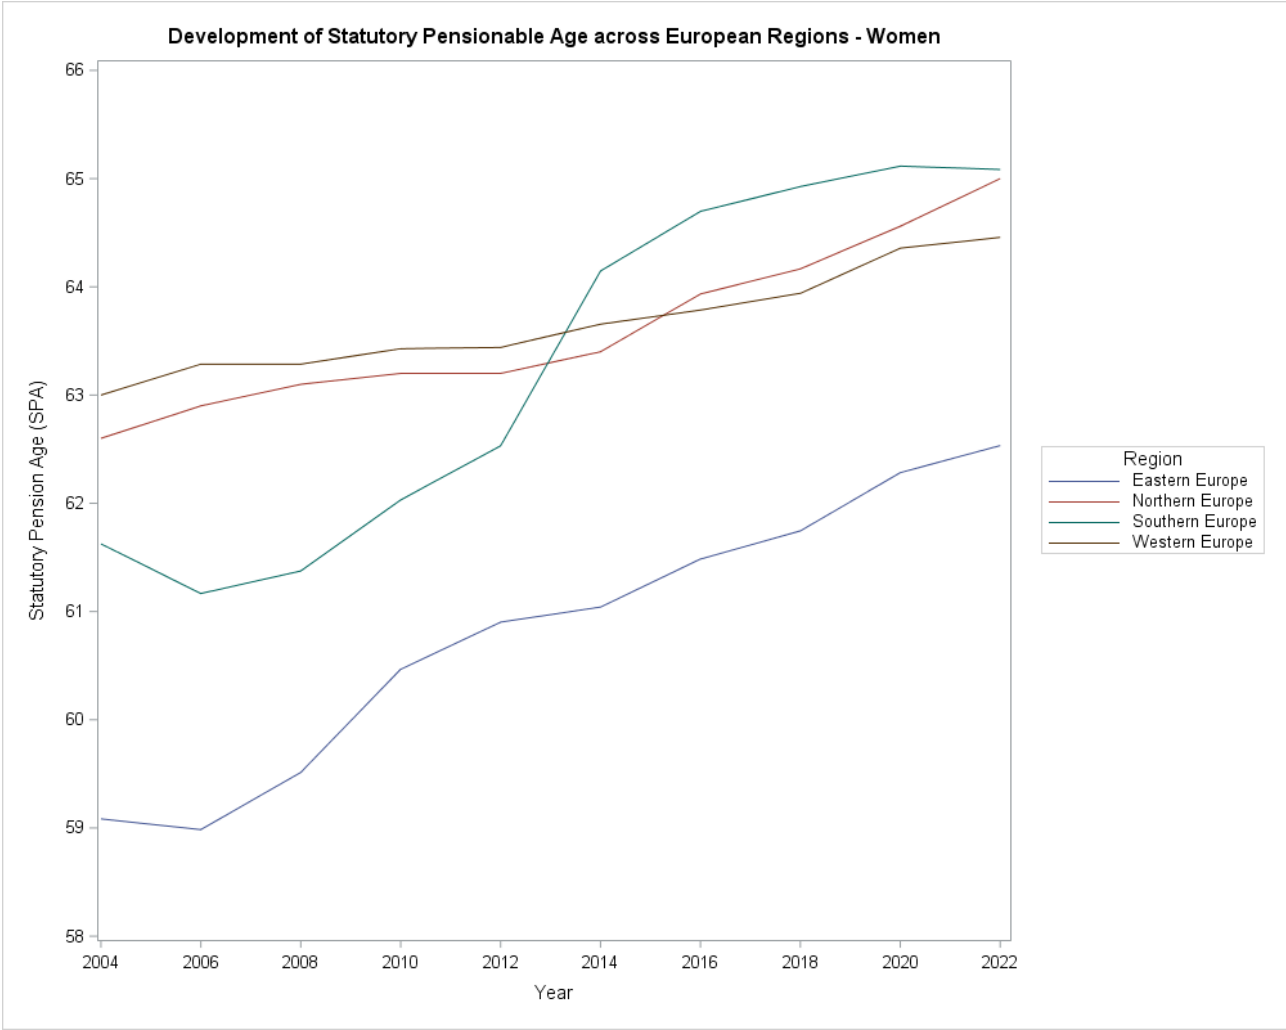

Supplement: SJWEH-50-622-S001.pdf [file SJWEH-50-622-S001.pdf]
